# Supplementary material for: Population genetic dynamics of the Ivory Snail (Babylonia areolata): Insights from coastal waters of Vietnam for conservation and aquaculture
Source: Research Square preprint supplement (doi:10.21203/rs.3.rs-6937476/v1), 2025-06-23
Supplement: Supplementary file 1 [file 5a401236a671468b8316f621.docx]

**Supplementary Information**


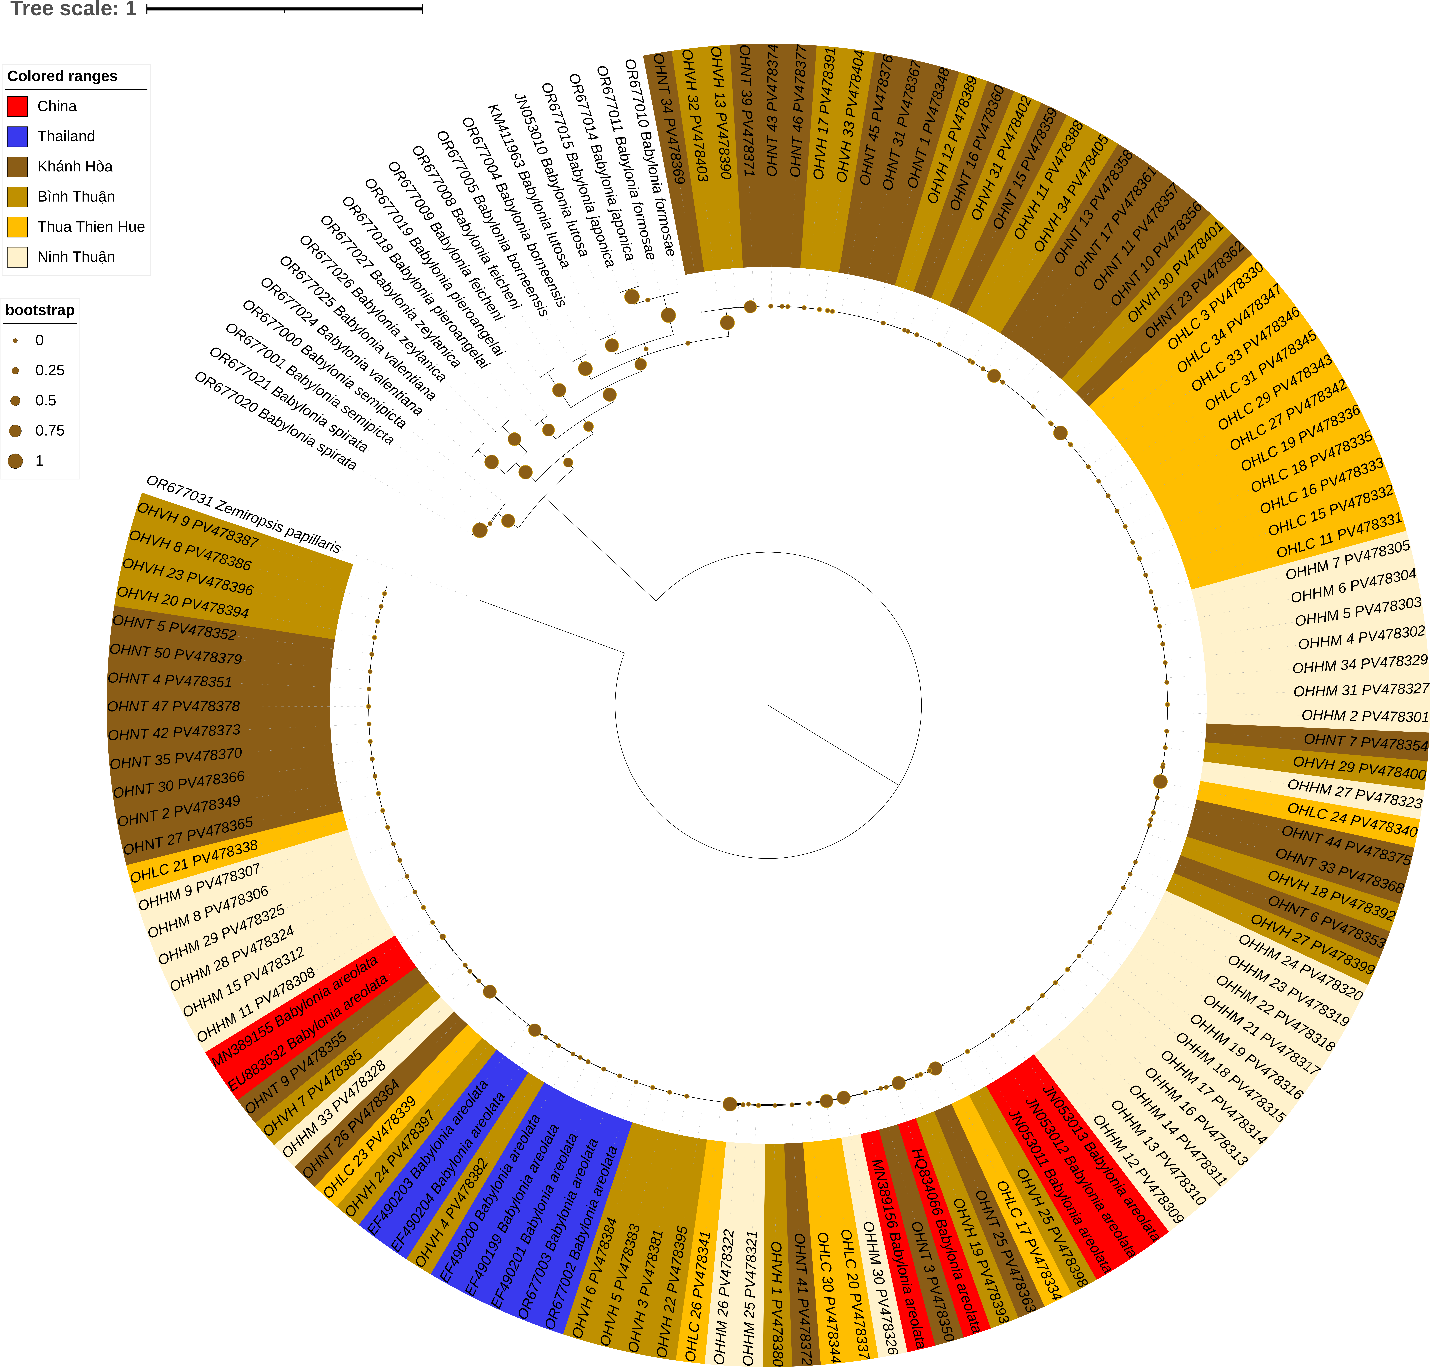


**Online Resource Fig. S1** Maximum likelihood phylogenetic tree based on partial mitochondrial *COI* gene sequences of B. areolata and related congeners.

**Online Resource Table S1** Details of *B. areolata* specimens analyzed in this study, including voucher numbers, geographic localities, and GenBank accession identifiers.

| **No.** | **Species** | **Voucher no.** | **Locality** | **Latitude** | **Longitude** | **Accession No.** |
| --- | --- | --- | --- | --- | --- | --- |
| 1 | *B. areolata* | OHHM_2 | Ninh Thuận, Vietnam | 11.582222°N | 109.055833°E | PV478301 |
| 2 | *B. areolata* | OHHM_4 | Ninh Thuận, Vietnam | 11.582222°N | 109.055833°E | PV478302 |
| 3 | *B. areolata* | OHHM_5 | Ninh Thuận, Vietnam | 11.582222°N | 109.055833°E | PV478303 |
| 4 | *B. areolata* | OHHM_6 | Ninh Thuận, Vietnam | 11.582222°N | 109.055833°E | PV478304 |
| 5 | *B. areolata* | OHHM_7 | Ninh Thuận, Vietnam | 11.582222°N | 109.055833°E | PV478305 |
| 6 | *B. areolata* | OHHM_8 | Ninh Thuận, Vietnam | 11.582222°N | 109.055833°E | PV478306 |
| 7 | *B. areolata* | OHHM_9 | Ninh Thuận, Vietnam | 11.582222°N | 109.055833°E | PV478307 |
| 8 | *B. areolata* | OHHM_11 | Ninh Thuận, Vietnam | 11.582222°N | 109.055833°E | PV478308 |
| 9 | *B. areolata* | OHHM_12 | Ninh Thuận, Vietnam | 11.582222°N | 109.055833°E | PV478309 |
| 10 | *B. areolata* | OHHM_13 | Ninh Thuận, Vietnam | 11.582222°N | 109.055833°E | PV478310 |
| 11 | *B. areolata* | OHHM_14 | Ninh Thuận, Vietnam | 11.582222°N | 109.055833°E | PV478311 |
| 12 | *B. areolata* | OHHM_15 | Ninh Thuận, Vietnam | 11.582222°N | 109.055833°E | PV478312 |
| 13 | *B. areolata* | OHHM_16 | Ninh Thuận, Vietnam | 11.582222°N | 109.055833°E | PV478313 |
| 14 | *B. areolata* | OHHM_17 | Ninh Thuận, Vietnam | 11.582222°N | 109.055833°E | PV478314 |
| 15 | *B. areolata* | OHHM_18 | Ninh Thuận, Vietnam | 11.582222°N | 109.055833°E | PV478315 |
| 16 | *B. areolata* | OHHM_19 | Ninh Thuận, Vietnam | 11.582222°N | 109.055833°E | PV478316 |
| 17 | *B. areolata* | OHHM_21 | Ninh Thuận, Vietnam | 11.582222°N | 109.055833°E | PV478317 |
| 18 | *B. areolata* | OHHM_22 | Ninh Thuận, Vietnam | 11.582222°N | 109.055833°E | PV478318 |
| 19 | *B. areolata* | OHHM_23 | Ninh Thuận, Vietnam | 11.582222°N | 109.055833°E | PV478319 |
| 20 | *B. areolata* | OHHM_24 | Ninh Thuận, Vietnam | 11.582222°N | 109.055833°E | PV478320 |
| 21 | *B. areolata* | OHHM_25 | Ninh Thuận, Vietnam | 11.582222°N | 109.055833°E | PV478321 |
| 22 | *B. areolata* | OHHM_26 | Ninh Thuận, Vietnam | 11.582222°N | 109.055833°E | PV478322 |
| 23 | *B. areolata* | OHHM_27 | Ninh Thuận, Vietnam | 11.582222°N | 109.055833°E | PV478323 |
| 24 | *B. areolata* | OHHM_28 | Ninh Thuận, Vietnam | 11.582222°N | 109.055833°E | PV478324 |
| 25 | *B. areolata* | OHHM_29 | Ninh Thuận, Vietnam | 11.582222°N | 109.055833°E | PV478325 |
| 26 | *B. areolata* | OHHM_30 | Ninh Thuận, Vietnam | 11.582222°N | 109.055833°E | PV478326 |
| 27 | *B. areolata* | OHHM_31 | Ninh Thuận, Vietnam | 11.582222°N | 109.055833°E | PV478327 |
| 28 | *B. areolata* | OHHM_33 | Ninh Thuận, Vietnam | 11.582222°N | 109.055833°E | PV478328 |
| 29 | *B. areolata* | OHHM_34 | Ninh Thuận, Vietnam | 11.582222°N | 109.055833°E | PV478329 |
| 30 | *B. areolata* | OHLC_3 | Thua Thien Hue, Vietnam | 16.241111°N | 108.082500°E | PV478330 |
| 31 | *B. areolata* | OHLC_11 | Thua Thien Hue, Vietnam | 16.241111°N | 108.082500°E | PV478331 |
| 32 | *B. areolata* | OHLC_15 | Thua Thien Hue, Vietnam | 16.241111°N | 108.082500°E | PV478332 |
| 33 | *B. areolata* | OHLC_16 | Thua Thien Hue, Vietnam | 16.241111°N | 108.082500°E | PV478333 |
| 34 | *B. areolata* | OHLC_17 | Thua Thien Hue, Vietnam | 16.241111°N | 108.082500°E | PV478334 |
| 35 | *B. areolata* | OHLC_18 | Thua Thien Hue, Vietnam | 16.241111°N | 108.082500°E | PV478335 |
| 36 | *B. areolata* | OHLC_19 | Thua Thien Hue, Vietnam | 16.241111°N | 108.082500°E | PV478336 |
| 37 | *B. areolata* | OHLC_20 | Thua Thien Hue, Vietnam | 16.241111°N | 108.082500°E | PV478337 |
| 38 | *B. areolata* | OHLC_21 | Thua Thien Hue, Vietnam | 16.241111°N | 108.082500°E | PV478338 |
| 39 | *B. areolata* | OHLC_23 | Thua Thien Hue, Vietnam | 16.241111°N | 108.082500°E | PV478339 |
| 40 | *B. areolata* | OHLC_24 | Thua Thien Hue, Vietnam | 16.241111°N | 108.082500°E | PV478340 |
| 41 | *B. areolata* | OHLC_26 | Thua Thien Hue, Vietnam | 16.241111°N | 108.082500°E | PV478341 |
| 42 | *B. areolata* | OHLC_27 | Thua Thien Hue, Vietnam | 16.241111°N | 108.082500°E | PV478342 |
| 43 | *B. areolata* | OHLC_29 | Thua Thien Hue, Vietnam | 16.241111°N | 108.082500°E | PV478343 |
| 44 | *B. areolata* | OHLC_30 | Thua Thien Hue, Vietnam | 16.241111°N | 108.082500°E | PV478344 |
| 45 | *B. areolata* | OHLC_31 | Thua Thien Hue, Vietnam | 16.241111°N | 108.082500°E | PV478345 |
| 46 | *B. areolata* | OHLC_33 | Thua Thien Hue, Vietnam | 16.241111°N | 108.082500°E | PV478346 |
| 47 | *B. areolata* | OHLC_34 | Thua Thien Hue, Vietnam | 16.241111°N | 108.082500°E | PV478347 |
| 48 | *B. areolata* | OHNT_1 | Khánh Hòa, Vietnam | 11.897778°N | 109.156111°E | PV478348 |
| 49 | *B. areolata* | OHNT_2 | Khánh Hòa, Vietnam | 11.897778°N | 109.156111°E | PV478349 |
| 50 | *B. areolata* | OHNT_3 | Khánh Hòa, Vietnam | 11.897778°N | 109.156111°E | PV478350 |
| 51 | *B. areolata* | OHNT_4 | Khánh Hòa, Vietnam | 11.897778°N | 109.156111°E | PV478351 |
| 52 | *B. areolata* | OHNT_5 | Khánh Hòa, Vietnam | 11.897778°N | 109.156111°E | PV478352 |
| 53 | *B. areolata* | OHNT_6 | Khánh Hòa, Vietnam | 11.897778°N | 109.156111°E | PV478353 |
| 54 | *B. areolata* | OHNT_7 | Khánh Hòa, Vietnam | 11.897778°N | 109.156111°E | PV478354 |
| 55 | *B. areolata* | OHNT_9 | Khánh Hòa, Vietnam | 11.897778°N | 109.156111°E | PV478355 |
| 56 | *B. areolata* | OHNT_10 | Khánh Hòa, Vietnam | 11.897778°N | 109.156111°E | PV478356 |
| 57 | *B. areolata* | OHNT_11 | Khánh Hòa, Vietnam | 11.897778°N | 109.156111°E | PV478357 |
| 58 | *B. areolata* | OHNT_13 | Khánh Hòa, Vietnam | 11.897778°N | 109.156111°E | PV478358 |
| 59 | *B. areolata* | OHNT_15 | Khánh Hòa, Vietnam | 11.897778°N | 109.156111°E | PV478359 |
| 60 | *B. areolata* | OHNT_16 | Khánh Hòa, Vietnam | 11.897778°N | 109.156111°E | PV478360 |
| 61 | *B. areolata* | OHNT_17 | Khánh Hòa, Vietnam | 11.897778°N | 109.156111°E | PV478361 |
| 62 | *B. areolata* | OHNT_23 | Khánh Hòa, Vietnam | 11.897778°N | 109.156111°E | PV478362 |
| 63 | *B. areolata* | OHNT_25 | Khánh Hòa, Vietnam | 11.897778°N | 109.156111°E | PV478363 |
| 64 | *B. areolata* | OHNT_26 | Khánh Hòa, Vietnam | 11.897778°N | 109.156111°E | PV478364 |
| 65 | *B. areolata* | OHNT_27 | Khánh Hòa, Vietnam | 11.897778°N | 109.156111°E | PV478365 |
| 66 | *B. areolata* | OHNT_30 | Khánh Hòa, Vietnam | 11.897778°N | 109.156111°E | PV478366 |
| 67 | *B. areolata* | OHNT_31 | Khánh Hòa, Vietnam | 11.897778°N | 109.156111°E | PV478367 |
| 68 | *B. areolata* | OHNT_33 | Khánh Hòa, Vietnam | 11.897778°N | 109.156111°E | PV478368 |
| 69 | *B. areolata* | OHNT_34 | Khánh Hòa, Vietnam | 11.897778°N | 109.156111°E | PV478369 |
| 70 | *B. areolata* | OHNT_35 | Khánh Hòa, Vietnam | 11.897778°N | 109.156111°E | PV478370 |
| 71 | *B. areolata* | OHNT_39 | Khánh Hòa, Vietnam | 11.897778°N | 109.156111°E | PV478371 |
| 72 | *B. areolata* | OHNT_41 | Khánh Hòa, Vietnam | 11.897778°N | 109.156111°E | PV478372 |
| 73 | *B. areolata* | OHNT_42 | Khánh Hòa, Vietnam | 11.897778°N | 109.156111°E | PV478373 |
| 74 | *B. areolata* | OHNT_43 | Khánh Hòa, Vietnam | 11.897778°N | 109.156111°E | PV478374 |
| 75 | *B. areolata* | OHNT_44 | Khánh Hòa, Vietnam | 11.897778°N | 109.156111°E | PV478375 |
| 76 | *B. areolata* | OHNT_45 | Khánh Hòa, Vietnam | 11.897778°N | 109.156111°E | PV478376 |
| 77 | *B. areolata* | OHNT_46 | Khánh Hòa, Vietnam | 11.897778°N | 109.156111°E | PV478377 |
| 78 | *B. areolata* | OHNT_47 | Khánh Hòa, Vietnam | 11.897778°N | 109.156111°E | PV478378 |
| 79 | *B. areolata* | OHNT_50 | Khánh Hòa, Vietnam | 11.897778°N | 109.156111°E | PV478379 |
| 80 | *B. areolata* | OHVH_1 | Bình Thuận, Vietnam | 10.573889°N | 107.582500°E | PV478380 |
| 81 | *B. areolata* | OHVH_3 | Bình Thuận, Vietnam | 10.573889°N | 107.582500°E | PV478381 |
| 82 | *B. areolata* | OHVH_4 | Bình Thuận, Vietnam | 10.573889°N | 107.582500°E | PV478382 |
| 83 | *B. areolata* | OHVH_5 | Bình Thuận, Vietnam | 10.573889°N | 107.582500°E | PV478383 |
| 84 | *B. areolata* | OHVH_6 | Bình Thuận, Vietnam | 10.573889°N | 107.582500°E | PV478384 |
| 85 | *B. areolata* | OHVH_7 | Bình Thuận, Vietnam | 10.573889°N | 107.582500°E | PV478385 |
| 86 | *B. areolata* | OHVH_8 | Bình Thuận, Vietnam | 10.573889°N | 107.582500°E | PV478386 |
| 87 | *B. areolata* | OHVH_9 | Bình Thuận, Vietnam | 10.573889°N | 107.582500°E | PV478387 |
| 88 | *B. areolata* | OHVH_11 | Bình Thuận, Vietnam | 10.573889°N | 107.582500°E | PV478388 |
| 89 | *B. areolata* | OHVH_12 | Bình Thuận, Vietnam | 10.573889°N | 107.582500°E | PV478389 |
| 90 | *B. areolata* | OHVH_13 | Bình Thuận, Vietnam | 10.573889°N | 107.582500°E | PV478390 |
| 91 | *B. areolata* | OHVH_17 | Bình Thuận, Vietnam | 10.573889°N | 107.582500°E | PV478391 |
| 92 | *B. areolata* | OHVH_18 | Bình Thuận, Vietnam | 10.573889°N | 107.582500°E | PV478392 |
| 93 | *B. areolata* | OHVH_19 | Bình Thuận, Vietnam | 10.573889°N | 107.582500°E | PV478393 |
| 94 | *B. areolata* | OHVH_20 | Bình Thuận, Vietnam | 10.573889°N | 107.582500°E | PV478394 |
| 95 | *B. areolata* | OHVH_22 | Bình Thuận, Vietnam | 10.573889°N | 107.582500°E | PV478395 |
| 96 | *B. areolata* | OHVH_23 | Bình Thuận, Vietnam | 10.573889°N | 107.582500°E | PV478396 |
| 97 | *B. areolata* | OHVH_24 | Bình Thuận, Vietnam | 10.573889°N | 107.582500°E | PV478397 |
| 98 | *B. areolata* | OHVH_25 | Bình Thuận, Vietnam | 10.573889°N | 107.582500°E | PV478398 |
| 99 | *B. areolata* | OHVH_27 | Bình Thuận, Vietnam | 10.573889°N | 107.582500°E | PV478399 |
| 100 | *B. areolata* | OHVH_29 | Bình Thuận, Vietnam | 10.573889°N | 107.582500°E | PV478400 |
| 101 | *B. areolata* | OHVH_30 | Bình Thuận, Vietnam | 10.573889°N | 107.582500°E | PV478401 |
| 102 | *B. areolata* | OHVH_31 | Bình Thuận, Vietnam | 10.573889°N | 107.582500°E | PV478402 |
| 103 | *B. areolata* | OHVH_32 | Bình Thuận, Vietnam | 10.573889°N | 107.582500°E | PV478403 |
| 104 | *B. areolata* | OHVH_33 | Bình Thuận, Vietnam | 10.573889°N | 107.582500°E | PV478404 |
| 105 | *B. areolata* | OHVH_34 | Bình Thuận, Vietnam | 10.573889°N | 107.582500°E | PV478405 |

**Online Resource Table S2** Details of *Babylonia* partial mitochondrial *COI* sequences retrieved from GenBank for phylogenetic analysis.

| **No.** | **Species** | **Accession no.** | **Locality** | **References** |
| --- | --- | --- | --- | --- |
| 1 | *Babylonia areolata* | JN053011 | Sea of Southern China | Zou et al. 2011a |
| 2 | *Babylonia areolata* | JN053012 | Zou et al. 2011a |
| 3 | *Babylonia areolata* | JN053013 | Zou et al. 2011a |
| 4 | *Babylonia areolata* | HQ834066 | Fujian, China | Zou et al. 2011b |
| 5 | *Babylonia areolata* | EU883632 | Xiamen, China | Hou et al. 2013 |
| 6 | *Babylonia areolata* | MN389156 | Hainan Island, China | Ran et al. 2020 |
| 7 | *Babylonia areolata* | MN389155 | Ran et al. 2020 |
| 8 | *Babylonia areolata* | EF490199 | Gulf of Thailand  (Phetchaburi, Rayong, Songkhla, and Pattani) | Hualkasin et al. 2008 |
| 9 | *Babylonia areolata* | EF490200 | Hualkasin et al. 2008 |
| 10 | *Babylonia areolata* | EF490201 | Hualkasin et al. 2008 |
| 11 | *Babylonia areolata* | EF490203 | Hualkasin et al. 2008 |
| 12 | *Babylonia areolata* | EF490204 | Hualkasin et al. 2008 |
| 13 | *Babylonia areolata* | OR677002 | Inshore of Rayong Province, Thailand | Yen et al. 2025 |
| 14 | *Babylonia areolata* | OR677003 | Yen et al. 2025 |
| 15 | *Babylonia spirata* | OR677020 | India | Yen et al. 2025 |
| 16 | *Babylonia spirata* | OR677021 | Yen et al. 2025 |
| 17 | *Babylonia semipicta* (*angusta*) | OR677000 | Indonesia | Yen et al. 2025 |
| 18 | *Babylonia semipicta* (*balinensis*) | OR677001 | Yen et al. 2025 |
| 19 | *Babylonia formosae* | OR677010 | Taiwan | Yen et al. 2025 |
| 20 | *Babylonia formosae* | OR677011 | Yen et al. 2025 |
| 21 | *Babylonia lutosa* | KM411963 | China | Wang 2017 |
| 22 | *Babylonia lutosa* | JN053010 | China | Zou et al. 2011a |
| 23 | *Babylonia zeylanica* | OR677026 | India | Yen et al. 2025 |
| 24 | *Babylonia zeylanica* | OR677027 | Yen et al. 2025 |
| 25 | *Babylonia japonica* | OR677014 | Japan | Yen et al. 2025 |
| 26 | *Babylonia japonica* | OR677015 | Yen et al. 2025 |
| 27 | *Babylonia borneensis* | OR677004 | Indonesia | Yen et al. 2025 |
| 28 | *Babylonia borneensis* | OR677005 | Yen et al. 2025 |
| 29 | *Babylonia feicheni* | OR677008 | Vietnam | Yen et al. 2025 |
| 30 | *Babylonia feicheni* | OR677009 | Yen et al. 2025 |
| 31 | *Babylonia valentiana* | OR677024 | Pakistan | Yen et al. 2025 |
| 32 | *Babylonia valentiana* | OR677025 | Yen et al. 2025 |
| 33 | *Babylonia pieroangelai* | OR677018 | China | Yen et al. 2025 |
| 34 | *Babylonia pieroangelai* | OR677019 | Yen et al. 2025 |
| 35 | *Zemiropsis papillaris* (outgroup) | OR677031 | London, South Africa | Yen et al. 2025 |

**Additional References**

Hou L, Dahms HU, Dong C et al (2013) Phylogenetic positions of some genera and species of the family Buccinidae (Gastropoda: Mollusca) from China based on ribosomal RNA and COI sequences. Chin Sci Bull 58:2315–2322. <https://doi.org/10.1007/s11434-013-5922-z>

Hualkasin W, Tongchuai W, Chotigeat W et al (2008) Phylogeography of Ivory shell (Babylonia areolata) in the Gulf of Thailand revealed by COI gene structure and differentiation of shell color by ITS1 DNA. Songklanakarin J Sci Technol 30:141–146.

Ran K, Li Q, Qi L et al (2020) DNA barcoding for identification of marine gastropod species from Hainan Island, China. Fish Res 225:105504. <https://doi.org/10.1016/j.fishres.2020.105504>

Wang P (2017) A preliminary analysis on the morphology, DNA barcoding, and isozyme of the Babylonia lutosa from Nanri Island in Putian. J Fish Res 39:249–263. <https://doi.org/10.14012/j.cnki.fjsc.2017.04.001>

Yen YH, Joseph J, Liu SYV (2025) Delimiting species boundaries within the Babyloniidae (Mollusca: Gastropoda: Neogastropoda) using multi-locus phylogenetic analysis. Zool Scr 54:17–32. <https://doi.org/10.1111/zsc.12694>

Zou S, Li Q, Kong L (2011b) Additional gene data and increased sampling give new insights into the phylogenetic relationships of Neogastropoda, within the caenogastropod phylogenetic framework. Mol Phylogenet Evol 61:425–435. <https://doi.org/10.1016/j.ympev.2011.07.014>

Zou S, Li Q, Kong L et al (2011a) Comparing the usefulness of distance, monophyly, and character-based DNA barcoding methods in species identification: A case study of Neogastropoda. PLoS One 6:e26619. <https://doi.org/10.1371/journal.pone.0026619>

**Online Resource Table S3** Partition-based species delimitation using the ABGD and ASAP methods revealed multiple putative OTUs within the studied species.

| **Partition** | **n** | **Sequences** |
| --- | --- | --- |
| Group [ 1 ] | 62 | EF490199_Babylonia_areolata EF490200_Babylonia_areolata JN053013_Babylonia_areolata JN053011_Babylonia_areolata JN053012_Babylonia_areolata OR677002_Babylonia_areolata OR677003_Babylonia_areolata OHHM_2_PV478301 OHHM_4_PV478302 OHHM_5_PV478303 OHHM_6_PV478304 OHHM_7_PV478305 OHHM_12_PV478309 OHHM_13_PV478310 OHHM_14_PV478311 OHHM_16_PV478313 OHHM_17_PV478314 OHHM_18_PV478315 OHHM_19_PV478316 OHHM_21_PV478317 OHHM_22_PV478318 OHHM_23_PV478319 OHHM_31_PV478327 OHHM_34_PV478329 OHLC_11_PV478331 OHLC_15_PV478332 OHLC_16_PV478333 OHLC_18_PV478335 OHLC_19_PV478336 OHLC_27_PV478342 OHLC_29_PV478343 OHLC_31_PV478345 OHLC_33_PV478346 OHLC_34_PV478347 OHNT_1_PV478348 OHNT_6_PV478353 OHNT_7_PV478354 OHNT_10_PV478356 OHNT_11_PV478357 OHNT_15_PV478359 OHNT_31_PV478367 OHNT_39_PV478371 OHNT_43_PV478374 OHNT_46_PV478377 OHVH_3_PV478381 OHVH_4_PV478382 OHVH_5_PV478383 OHVH_6_PV478384 OHVH_11_PV478388 OHVH_12_PV478389 OHVH_13_PV478390 OHVH_17_PV478391 OHVH_22_PV478395 OHVH_24_PV478397 OHVH_25_PV478398 OHVH_27_PV478399 OHVH_29_PV478400 OHVH_30_PV478401 OHVH_31_PV478402 OHVH_32_PV478403 OHVH_33_PV478404 OHVH_34_PV478405 |
| Group [ 2 ] | 1 | EF490201_Babylonia_areolata |
| Group [ 3 ] | 1 | HQ834066_Babylonia_areolata |
| Group [ 4 ] | 1 | EF490204_Babylonia_areolata |
| Group [ 5 ] | 1 | EF490203_Babylonia_areolata |
| Group [ 6 ] | 22 | EU883632_Babylonia_areolata MN389155_Babylonia_areolata OHHM_8_PV478306 OHHM_9_PV478307 OHHM_11_PV478308 OHHM_15_PV478312 OHHM_28_PV478324 OHHM_29_PV478325 OHLC_21_PV478338 OHNT_2_PV478349 OHNT_4_PV478351 OHNT_5_PV478352 OHNT_27_PV478365 OHNT_30_PV478366 OHNT_35_PV478370 OHNT_42_PV478373 OHNT_47_PV478378 OHNT_50_PV478379 OHVH_8_PV478386 OHVH_9_PV478387 OHVH_20_PV478394 OHVH_23_PV478396 |
| Group [ 7 ] | 1 | MN389156_Babylonia_areolata |
| Group [ 8 ] | 1 | OHHM_24_PV478320 |
| Group [ 9 ] | 1 | OHHM_25_PV478321 |
| Group [ 10 ] | 2 | OHHM_26_PV478322 OHLC_26_PV478341 |
| Group [ 11 ] | 4 | OHHM_27_PV478323 OHLC_24_PV478340 OHNT_44_PV478375 OHVH_18_PV478392 |
| Group [ 12 ] | 5 | OHHM_30_PV478326 OHLC_20_PV478337 OHLC_30_PV478344 OHNT_41_PV478372 OHVH_1_PV478380 |
| Group [ 13 ] | 1 | OHHM_33_PV478328 |
| Group [ 14 ] | 2 | OHLC_3_PV478330 OHNT_23_PV478362 |
| Group [ 15 ] | 1 | OHLC_17_PV478334 |
| Group [ 16 ] | 3 | OHLC_23_PV478339 OHNT_26_PV478364 OHVH_7_PV478385 |
| Group [ 17 ] | 1 | OHNT_3_PV478350 |
| Group [ 18 ] | 1 | OHNT_9_PV478355 |
| Group [ 19 ] | 1 | OHNT_13_PV478358 |
| Group [ 20 ] | 1 | OHNT_16_PV478360 |
| Group [ 21 ] | 1 | OHNT_17_PV478361 |
| Group [ 22 ] | 1 | OHNT_25_PV478363 |
| Group [ 23 ] | 1 | OHNT_33_PV478368 |
| Group [ 24 ] | 1 | OHNT_34_PV478369 |
| Group [ 25 ] | 1 | OHNT_45_PV478376 |
| Group [ 26 ] | 1 | OHVH_19_PV478393 |

**Online Resource Table S4** Partition-based species delimitation using the PTP method revealed multiple putative OTUs within the studied species.

| **Partition** | **Sequences** |
| --- | --- |
| Species_1 | OHVH_19_PV478393 |
| Species_2 | OHNT_25_PV478363 |
| Species_3 | OHLC_17_PV478334 |
| Species_4 | OHVH_34_PV478405 |
| Species_5 | OHVH_31_PV478402 |
| Species_6 | OHLC_18_PV478335,OHLC_29_PV478343,OHLC_31_PV478345,OHLC_33_PV478346,OHLC_34_PV478347,OHNT_6_PV478353,OHNT_23_PV478362,OHLC_3_PV478330,OHVH_25_PV478398,OHNT_11_PV478357,OHNT_15_PV478359,OHVH_11_PV478388,OHVH_27_PV478399,OHNT_16_PV478360,OHNT_1_PV478348,OHNT_31_PV478367,OHVH_12_PV478389,OHNT_34_PV478369,OHVH_29_PV478400,OHNT_39_PV478371,OHNT_43_PV478374,OHNT_46_PV478377,OHVH_13_PV478390,OHVH_30_PV478401,OHNT_45_PV478376,OHNT_7_PV478354,OHVH_32_PV478403,OHNT_13_PV478358,OHNT_17_PV478361,OHNT_10_PV478356,OHLC_27_PV478342,OHLC_19_PV478336 |
| Species_7 | OHLC_16_PV478333 |
| Species_8 | OHLC_15_PV478332 |
| Species_9 | OHLC_11_PV478331 |
| Species_10 | OHHM_7_PV478305 |
| Species_11 | OHHM_6_PV478304 |
| Species_12 | OHHM_5_PV478303 |
| Species_13 | OHHM_4_PV478302 |
| Species_14 | OHHM_34_PV478329 |
| Species_15 | OHHM_31_PV478327 |
| Species_16 | OHHM_2_PV478301 |
| Species_17 | OHVH_24_PV478397,OHHM_27_PV478323,OHLC_24_PV478340,OHNT_44_PV478375,OHNT_33_PV478368,OHVH_18_PV478392 |
| Species_18 | OHHM_24_PV478320,OHVH_22_PV478395 |
| Species_19 | OHHM_23_PV478319 |
| Species_20 | OHHM_22_PV478318 |
| Species_21 | OHHM_21_PV478317 |
| Species_22 | OHHM_19_PV478316 |
| Species_23 | OHHM_18_PV478315 |
| Species_24 | OHHM_17_PV478314 |
| Species_25 | OHHM_16_PV478313 |
| Species_26 | OHHM_14_PV478311 |
| Species_27 | OHHM_13_PV478310 |
| Species_28 | OHHM_12_PV478309 |
| Species_29 | OHVH_17_PV478391,OHVH_3_PV478381,OR677002_Babylonia_areolata,OHVH_5_PV478383,OHVH_6_PV478384,EF490201_Babylonia_areolata,EF490199_Babylonia_areolata,OHVH_4_PV478382,EF490200_Babylonia_areolata,EF490204_Babylonia_areolata,EF490203_Babylonia_areolata,OHVH_33_PV478404 |
| Species_30 | OR677003_Babylonia_areolata |
| Species_31 | JN053011_Babylonia_areolata,OHLC_23_PV478339,OHNT_26_PV478364,OHVH_7_PV478385,OHHM_33_PV478328,MN389155_Babylonia_areolata,OHNT_9_PV478355,EU883632_Babylonia_areolata,OHHM_15_PV478312,OHHM_28_PV478324,OHHM_29_PV478325,OHHM_8_PV478306,OHHM_9_PV478307,OHLC_21_PV478338,OHNT_27_PV478365,OHNT_2_PV478349,OHNT_35_PV478370,OHNT_42_PV478373,OHNT_47_PV478378,OHNT_50_PV478379,OHNT_5_PV478352,OHVH_20_PV478394,OHVH_23_PV478396,OHVH_9_PV478387,OHVH_8_PV478386,OHNT_4_PV478351,OHNT_30_PV478366,OHHM_11_PV478308 |
| Species_32 | JN053012_Babylonia_areolata |
| Species_33 | OHNT_3_PV478350,HQ834066_Babylonia_areolata |
| Species_34 | OHHM_25_PV478321 |
| Species_35 | OHHM_26_PV478322,OHLC_26_PV478341 |
| Species_36 | OHVH_1_PV478380 |
| Species_37 | OHNT_41_PV478372 |
| Species_38 | OHLC_30_PV478344 |
| Species_39 | OHLC_20_PV478337 |
| Species_40 | OHHM_30_PV478326 |
| Species_41 | MN389156_Babylonia_areolata |
| Species_42 | JN053013_Babylonia_areolata |

**Online Resource Table S5** Partition-based species delimitation using the GMYC method revealed multiple putative OTUs within the studied species.

| **Partition** | **Sequences** |
| --- | --- |
| Species_1 | OHLC_26_PV478341, OHHM_25_PV478321, OHVH_1_PV478380, OHNT_41_PV478372, OHLC_30_PV478344, OHLC_20_PV478337, OHHM_30_PV478326, MN389156_Babylonia_areolata, JN053013_Babylonia_areolata, JN053012_Babylonia_areolata, OHVH_19_PV478393, OHNT_3_PV478350, HQ834066_Babylonia_areolata, JN053011_Babylonia_areolata, OHLC_23_PV478339, OHNT_26_PV478364, OHVH_7_PV478385, OHHM_33_PV478328, MN389155_Babylonia_areolata, OHNT_9_PV478355, EU883632_Babylonia_areolata, OHHM_15_PV478312, OHHM_28_PV478324, OHHM_29_PV478325, OHHM_8_PV478306, OHHM_9_PV478307, OHLC_21_PV478338, OHNT_27_PV478365, OHNT_2_PV478349, OHNT_35_PV478370, OHNT_42_PV478373, OHNT_47_PV478378, OHNT_50_PV478379, OHNT_5_PV478352, OHVH_20_PV478394, OHVH_23_PV478396, OHVH_9_PV478387, OHVH_8_PV478386, OHNT_4_PV478351, OHNT_30_PV478366, OHHM_11_PV478308, OR677003_Babylonia_areolata, OHVH_17_PV478391, OHVH_3_PV478381, OR677002_Babylonia_areolata, OHVH_5_PV478383, OHVH_6_PV478384, EF490201_Babylonia_areolata, EF490199_Babylonia_areolata, OHVH_4_PV478382, EF490200_Babylonia_areolata, EF490204_Babylonia_areolata, EF490203_Babylonia_areolata, OHVH_33_PV478404, OHHM_12_PV478309, OHHM_13_PV478310, OHHM_14_PV478311, OHHM_16_PV478313, OHHM_17_PV478314, OHHM_18_PV478315, OHHM_19_PV478316, OHHM_21_PV478317, OHHM_22_PV478318, OHHM_23_PV478319, OHHM_24_PV478320, OHVH_22_PV478395, OHVH_24_PV478397, OHHM_27_PV478323, OHLC_24_PV478340, OHNT_44_PV478375, OHNT_33_PV478368, OHVH_18_PV478392, OHHM_2_PV478301, OHHM_34_PV478329, OHHM_4_PV478302, OHHM_5_PV478303, OHHM_6_PV478304, OHHM_7_PV478305, OHLC_11_PV478331, OHLC_15_PV478332, OHLC_16_PV478333, OHLC_18_PV478335, OHLC_29_PV478343, OHLC_31_PV478345, OHLC_33_PV478346, OHLC_34_PV478347, OHNT_6_PV478353, OHNT_23_PV478362, OHLC_3_PV478330, OHVH_25_PV478398, OHNT_11_PV478357, OHNT_15_PV478359, OHVH_11_PV478388, OHVH_27_PV478399, OHNT_16_PV478360, OHNT_1_PV478348, OHNT_31_PV478367, OHVH_12_PV478389, OHNT_34_PV478369, OHVH_29_PV478400, OHNT_39_PV478371, OHNT_43_PV478374, OHNT_46_PV478377, OHVH_13_PV478390, OHVH_30_PV478401, OHNT_45_PV478376, OHNT_7_PV478354, OHVH_32_PV478403, OHNT_13_PV478358, OHNT_17_PV478361, OHNT_10_PV478356, OHLC_27_PV478342, OHLC_19_PV478336, OHVH_31_PV478402, OHVH_34_PV478405, OHNT_25_PV478363, OHLC_17_PV478334, OHHM_31_PV478327, |
| Species_2 | OHHM_26_PV478322 |

**Online Resource Table S6** Haplotype assignments of B. areolata based on partial mitochondrial *COI* gene sequences.

| **Number of haplotypes** | **Sequences** |
| --- | --- |
| Hap_1 | EF490199_Babylonia_areolata EF490200_Babylonia_areolata JN053013_Babylonia_areolata JN053011_Babylonia_areolata JN053012_Babylonia_areolata OR677002_Babylonia_areolata OR677003_Babylonia_areolata OHHM_2_PV478301 OHHM_4_PV478302 OHHM_5_PV478303 OHHM_6_PV478304 OHHM_7_PV478305 OHHM_12_PV478309 OHHM_13_PV478310 OHHM_14_PV478311 OHHM_16_PV478313 OHHM_17_PV478314 OHHM_18_PV478315 OHHM_19_PV478316 OHHM_21_PV478317 OHHM_22_PV478318 OHHM_23_PV478319 OHHM_31_PV478327 OHHM_34_PV478329 OHLC_11_PV478331 OHLC_15_PV478332 OHLC_16_PV478333 OHLC_18_PV478335 OHLC_19_PV478336 OHLC_27_PV478342 OHLC_29_PV478343 OHLC_31_PV478345 OHLC_33_PV478346 OHLC_34_PV478347 OHNT_1_PV478348 OHNT_6_PV478353 OHNT_7_PV478354 OHNT_10_PV478356 OHNT_11_PV478357 OHNT_15_PV478359 OHNT_31_PV478367 OHNT_39_PV478371 OHNT_43_PV478374 OHNT_46_PV478377 OHVH_3_PV478381 OHVH_4_PV478382 OHVH_5_PV478383 OHVH_6_PV478384 OHVH_11_PV478388 OHVH_12_PV478389 OHVH_13_PV478390 OHVH_17_PV478391 OHVH_22_PV478395 OHVH_24_PV478397 OHVH_25_PV478398 OHVH_27_PV478399 OHVH_29_PV478400 OHVH_30_PV478401 OHVH_31_PV478402 OHVH_32_PV478403 OHVH_33_PV478404 OHVH_34_PV478405 |
| Hap_2 | EF490201_Babylonia_areolata |
| Hap_3 | HQ834066_Babylonia_areolata |
| Hap_4 | EF490204_Babylonia_areolata |
| Hap_5 | EF490203_Babylonia_areolata |
| Hap_6 | EU883632_Babylonia_areolata MN389155_Babylonia_areolata OHHM_8_PV478306 OHHM_9_PV478307 OHHM_11_PV478308 OHHM_15_PV478312 OHHM_28_PV478324 OHHM_29_PV478325 OHLC_21_PV478338 OHNT_2_PV478349 OHNT_4_PV478351 OHNT_5_PV478352 OHNT_27_PV478365 OHNT_30_PV478366 OHNT_35_PV478370 OHNT_42_PV478373 OHNT_47_PV478378 OHNT_50_PV478379 OHVH_8_PV478386 OHVH_9_PV478387 OHVH_20_PV478394 OHVH_23_PV478396 |
| Hap_7 | MN389156_Babylonia_areolata |
| Hap_8 | OHHM_24_PV478320 |
| Hap_9 | OHHM_25_PV478321 |
| Hap_10 | OHHM_26_PV478322 OHLC_26_PV478341 |
| Hap_11 | OHHM_27_PV478323 OHLC_24_PV478340 OHNT_44_PV478375 OHVH_18_PV478392 |
| Hap_12 | OHHM_30_PV478326 OHLC_20_PV478337 OHLC_30_PV478344 OHNT_41_PV478372 OHVH_1_PV478380 |
| Hap_13 | OHHM_33_PV478328 |
| Hap_14 | OHLC_3_PV478330 OHNT_23_PV478362 |
| Hap_15 | OHLC_17_PV478334 |
| Hap_16 | OHLC_23_PV478339 OHNT_26_PV478364 OHVH_7_PV478385 |
| Hap_17 | OHNT_3_PV478350 |
| Hap_18 | OHNT_9_PV478355 |
| Hap_19 | OHNT_13_PV478358 |
| Hap_20 | OHNT_16_PV478360 |
| Hap_21 | OHNT_17_PV478361 |
| Hap_22 | OHNT_25_PV478363 |
| Hap_23 | OHNT_33_PV478368 |
| Hap_24 | OHNT_34_PV478369 |
| Hap_25 | OHNT_45_PV478376 |
| Hap_26 | OHVH_19_PV478393 |
